RESEARCH ARTICLE

# Spatial Scales of Genetic Structure in Free-Standing and Strangler Figs (*Ficus*, Moraceae) Inhabiting Neotropical Forests

Katrin Heer<sup>1,2,3\*</sup>, Elisabeth K. V. Kalko<sup>3,4†</sup>, Larissa Albrecht<sup>3</sup>, Roosevelt García-Villacorta<sup>5</sup>, Felix C. Staeps<sup>1</sup>, Edward Allen Herre<sup>4</sup>, Christopher W. Dick<sup>6</sup>

**1** Conservation Biology, Faculty of Biology, Philipps-University Marburg, Karl-von-Frisch-Strasse 8, 35043 Marburg, Germany, **2** Department of Ecology, Faculty of Biology, Philipps-University Marburg, Karl-von-Frisch-Strasse 8, 35043 Marburg, Germany, **3** Institute of Experimental Ecology, University of Ulm, Albert-Einstein-Allee 11, 89069 Ulm, Germany, **4** Smithsonian Tropical Research Institute, P.O. Box 0843–03092, Balboa, Panamá, **5** Institute of Molecular Plant Sciences, University of Edinburgh, Mayfield Rd, Edinburgh EH9 3JH, United Kingdom, **6** Department of Ecology and Evolutionary Biology, University of Michigan, 830 North University, 2019 Kraus Natural Science Building, Ann Arbor, MI 48109–1048 United States of America

† Deceased.

\* [katrin.heer@uni-marburg.de](mailto:katrin.heer@uni-marburg.de)

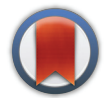

CrossMark  
click for updates

## OPEN ACCESS

**Citation:** Heer K, Kalko EKV, Albrecht L, García-Villacorta R, Staeps FC, Herre EA, et al. (2015) Spatial Scales of Genetic Structure in Free-Standing and Strangler Figs (*Ficus*, Moraceae) Inhabiting Neotropical Forests. PLoS ONE 10(7): e0133581. doi:10.1371/journal.pone.0133581

**Editor:** Wolfgang Arthofer, University of Innsbruck, AUSTRIA

**Received:** May 19, 2014

**Accepted:** June 30, 2015

**Published:** July 30, 2015

**Copyright:** This is an open access article, free of all copyright, and may be freely reproduced, distributed, transmitted, modified, built upon, or otherwise used by anyone for any lawful purpose. The work is made available under the [Creative Commons CC0](https://creativecommons.org/licenses/by/4.0/) public domain dedication.

**Funding:** The project was funded by a scholarship from the German National Merit Foundation (Studienstiftung des Deutschen Volkes) to KH and NSF funding (DEB 0640379) to CWD. The funders had no role in study design, data collection and analysis, decision to publish, or preparation of the manuscript.

**Competing Interests:** The authors have declared that no competing interests exist.

## Abstract

Wind-borne pollinating wasps (Agaonidae) can transport fig (*Ficus* sp., Moraceae) pollen over enormous distances (> 100 km). Because of their extensive breeding areas, Neotropical figs are expected to exhibit weak patterns of genetic structure at local and regional scales. We evaluated genetic structure at the regional to continental scale (Panama, Costa Rica, and Peru) for the free-standing fig species *Ficus insipida*. Genetic differentiation was detected only at distances > 300 km (Jost's  $D_{est} = 0.68 \pm 0.07$  &  $F_{ST} = 0.30 \pm 0.03$  between Mesoamerican and Amazonian sites) and evidence for phylogeographic structure ( $R_{ST} >>$  permuted  $R_{ST}$ ) was only significant in comparisons between Central and South America. Further, we assessed local scale spatial genetic structure (SGS,  $d \leq 8$  km) in Panama and developed an agent-based model parameterized with data from *F. insipida* to estimate minimum pollination distances, which determine the contribution of pollen dispersal on SGS. The local scale data for *F. insipida* was compared to SGS data collected for an additional free-standing fig, *F. yoponensis* (subgenus *Pharmacosyceae*), and two species of strangler figs, *F. citrifolia* and *F. obtusifolia* (subgenus *Urostigma*) sampled in Panama. All four species displayed significant SGS (mean  $Sp = 0.014 \pm 0.012$ ). Model simulations indicated that most pollination events likely occur at distances >> 1 km, largely ruling out spatially limited pollen dispersal as the determinant of SGS in *F. insipida* and, by extension, the other fig species. Our results are consistent with the view that *Ficus* develops fine-scale SGS primarily as a result of localized seed dispersal and/or clumped seedling establishment despite extensive long-distance pollen dispersal. We discuss several ecological and life history factors that could have species- or subgenus-specific impacts on the genetic structure of Neotropical figs.

## Introduction

In contrast with high latitude forests, where wind is often the primary vector of pollen- and seed-mediated gene flow in trees, animals are the predominant pollinators and dispersers of tropical trees [1,2]. Biotic interactions thus play a vital role in gene flow and the maintenance of genetic diversity in tropical trees, and genetic based parentage analyses have shown that insects frequently transport pollen over hundreds to thousands of meters (reviewed in [2]). To date, the greatest insect-mediated pollen dispersal distance of 160 km [3] has been recorded for a fig tree (*Ficus* spp., Moraceae). Fig trees have specialized, often species-specific relationships with minute (1–2 mm) wasps in the family Agaonidae [4,5,6]. Although fig-pollinating wasps are weak flyers and live only 1–2 days, they can be carried long distances by wind currents [3,7]. Figs, particularly in the Neotropics, typically occur at low population densities (e.g. one adult/ha). Further, they flower asynchronously, which increases the already large distances between potential mates [4]. Thus, large pollen dispersal distances in figs are the rule rather than the exception and breeding areas are considered to be huge [7]. Some authors have even suggested that figs might be panmictic at regional spatial scales [8,9].

There is some debate about how patterns of gene dispersal distances, and therefore spatial genetic structure (SGS), are likely to differ among *Ficus* life forms and subgenera [10,11,12]. For example, functionally dioecious figs of Paleotropical forests are often small in stature, and have clumped distributions and locally dispersing wasp pollinators [10,11,13], traits which could impede long distance gene flow and enhance SGS relative to monoecious species (Table 1). Dev et al. [11] hypothesized that Neotropical species should exhibit weaker SGS than the Indian species in their study, and in dioecious Paleotropical *Ficus* more generally. Nazareno et al. [12] subsequently performed an SGS analysis of two fig species (subgenus *Urostigma*) in Brazil and indeed found evidence of significantly lower SGS as measured by the *Sp* statistic, which measures degree of SGS [14].

Within the Neotropical *Ficus*, the two subgenera exhibit contrasting life histories that could further influence genetic structure (see Table 1). For example, free-standing figs (subgenus *Pharmacosycea*) require high light intensities mostly encountered in large light gaps [15], which could lead to clumped pattern of seedling recruitment. In contrast, strangler figs (subgenus *Urostigma*) establish as hemi-epiphytes on host trees, rendering effective seed dispersal a more spatially random process.

**Table 1. Characteristics of the four studied Neotropical *Ficus* species.** Calculation of Nearest Neighbour distance (median with 25th/75th percentile in parentheses) is based on census data by Albrecht, Kalko and Handley.

| Species                    | <i>Ficus insipida</i> Willd.              | <i>Ficus yoponensis</i> Desv.            | <i>Ficus citrifolia</i> Mill.          | <i>Ficus obtusifolia</i> Kunth           |
|----------------------------|-------------------------------------------|------------------------------------------|----------------------------------------|------------------------------------------|
| Subgenus                   | <i>Pharmacosycea</i>                      |                                          | <i>Urostigma</i>                       |                                          |
| Growth form                | large, free-standing trees                |                                          | mostly stranglers or hemi-epiphytes    |                                          |
| Regeneration               | in light gaps                             |                                          | on host trees                          |                                          |
| Flowering pattern          | asynchronous in population                |                                          |                                        |                                          |
| Pollen dispersal distances | wide ranging (> 10 km)                    |                                          |                                        |                                          |
| Main seed dispersers       | frugivorous bats (Phyllostomidae)         |                                          |                                        |                                          |
| Pollinating fig wasp       | <i>Tetrapus costaricanus</i> Grandi, 1925 | <i>Tetrapus ecuadoranus</i> Grandi, 1934 | <i>Pegoscapus tonduzi</i> Grandi, 1919 | <i>Pegoscapus Hoffmeyer</i> Grandi, 1934 |
| Fruit weight               | 9.5 ± 1.3 g                               | 3.1 ± 0.7 g                              | 1.6 ± 0.3 g                            | 9.5 ± 1.4 g                              |
| Tree density (in m)        | 36 (16–87) <sup>1</sup>                   | 94 (37–208) <sup>1</sup>                 | 98 (38–231) <sup>1</sup>               | 99 (49–209) <sup>1</sup>                 |
| References                 | [65,78]                                   |                                          |                                        |                                          |

doi:10.1371/journal.pone.0133581.t001

At the biogeographic scale, genetic structure has been shown for several fig species [16,17]. A recent study of the free-standing Neotropical species *Ficus insipida* subs. *insipida* showed significant cpDNA haplotype differentiation between Mesoamerican and western Amazon samples [18]. Using a molecular clock approach, these authors suggested a mid-Miocene (14.6 Ma, range 5.1 to 26.4 Ma) divergence time of the South and Central American haplotypes. Given the absence of differentiation at the nuclear ITS locus, the authors suggested that the phylogeographic structure was caused primarily by seed dispersal limitation combined with the geographically isolating effects of the northern Andes and Llanos region.

Here we present an analysis of genetic structure in Neotropical figs based on nuclear microsatellite data. Our study spans local, regional, and continental spatial scales for *Ficus insipida*, and compares local scale spatial genetic structure (SGS) in an additional free-standing fig, *F. yoponensis* (subgenus *Pharmacosycea*), and two species of strangler figs, *F. citrifolia* and *F. obtusifolia* (subgenus *Urostigma*) within Panama. Using data from *F. insipida*, we developed and parameterized an agent-based model to estimate minimum pollen dispersal distances. We then evaluated the extent to which pollen dispersal is expected to drive SGS in our study species. Finally, in order to determine whether our microsatellite data concurs with results from plastid and ITS sequences in showing population differentiation for *F. insipida* across its distribution range [18], we sampled the widespread species *F. insipida* (subgenus *Pharmacosycea*) broadly within the Panama Canal Watershed, and in Costa Rica and Peru and tested for phylogeographic structure at these nuclear loci.

## Material & Methods

### Studied species

There are more than 750 *Ficus* species (family Moraceae) worldwide [19,20] from monoecious and functionally dioecious subgenera. In the Neotropics, only monoecious species of two of the four acknowledged fig subgenera are present [21]. Molecular and morphological evidence suggest that subgenus *Pharmacosycea* is phylogenetically distant from *Americana* [22]. Trees of the subgenus *Pharmacosycea* are pollinated by fig wasps of the genus *Tetrapus* (Agaonidae) and grow as free-standing trees that mostly establish in early successional stages due to their initial dependency on high light intensity [15]. Species belonging to the subgenus *Urostigma* (section *Americana*) grow mostly as hemi-epiphytes or strangler figs on host trees (hereafter we will refer to *Urostigma* as “strangler figs”). *Americana* figs are pollinated by fig wasps of the genus *Pegoscapus* [19].

In our study area in Panama, 13 of 16 fig species ripen medium to large, green, inconspicuous fruits that are mostly removed at night [23] suggesting that the seeds are mainly dispersed by fruit-eating bats of the Neotropical family of leaf-nosed bats (Phyllostomidae, Chiroptera). We concentrated our study on the most common and widespread species *F. insipida*. At the local scale we included a second free-standing fig species *F. yoponensis*, and two species of strangler figs, *F. citrifolia* and *F. obtusifolia*, all of which are mainly dispersed by fruit-eating bats. *Ficus obtusifolia* usually grows as a strangler fig or hemi-epiphyte, and seldom as free-standing tree. Large individuals are most frequently found in mature forests. In contrast, *F. citrifolia* mostly grows as a small hemi-epiphyte or bush and is frequently found on palm trees in the study area (see [Table 1](#) for more details on the studied species).

### Study sites and sampling

The study of local SGS was conducted in tropical moist forest on several islands and peninsulas within the Barro Colorado Nature Monument (BCNM, [Fig 1](#) and [S1 Fig](#)), Republic of Panama. Annual rainfall at BCNM averages 2,600 mm and there is a pronounced dry season from mid-

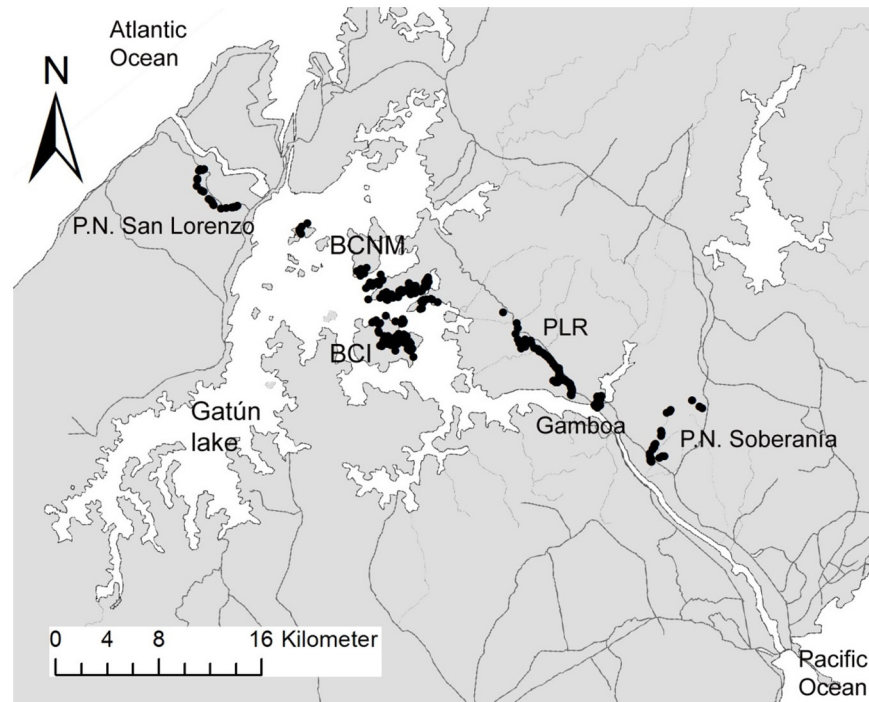

**Fig 1. Sampling sites of *F. insipida* located along the Panama Canal.** Black dots indicate sampled individuals. (BCNM: Barro Colorado Nature Monument, BCI: Barro Colorado Island, PLR: Pipeline Road, detailed maps for all species sampled in BCNM are presented in [S3 Fig](#)).

doi:10.1371/journal.pone.0133581.g001

December to mid-April. The largest island in the BCNM with about 15.6 km<sup>2</sup> is Barro Colorado Island (BCI) where adult figs have been censused repeatedly since 1973 [24,25]. Since 1982, fig populations have been censused along the shoreline of many additional islands and peninsulas (Albrecht, Herre, unpubl. data), and we collected samples of a high number of individuals despite the low population densities of the four targeted fig species. The free-standing *F. insipida* (n = 190) is by far the most common fig species in the vicinity of the Panama Canal and relatively abundant along the shoreline as well as on the North-Eastern part of BCI which is covered by secondary forest of about 90–150 years [26]. In contrast, the free-standing fig *F. yoponensis* (n = 37) is relatively rare along most shorelines and thus sampling was limited to the secondary forest on BCI. The strangler figs *F. citrifolia* (n = 62) and *F. obtusifolia* (n = 59) were mostly sampled along the shoreline, as few individuals are known from the core region of the main island (S1 Fig). Because exhaustive census data are restricted to the main island and to the shoreline of the surrounding islands and peninsulas, we were not able to determine the overall fig tree density but calculated Nearest Neighbor (NN) distances based on all censused individuals (Table 1).

Our focal species *F. insipida* was additionally sampled at several sites within the Panama Canal watershed. First, we collected samples along a 7 km stretch of Pipeline Road (PLR in the following, n = 155), within in Soberanía National Park, for more intensive studies of spatial genetic structure, including a comparison of SGS in adults (dbh ≥ 10 cm, n = 67) and saplings (< 3 m in height and with soft leaves, n = 73). While mostly situated within 20 m from the dirt road, some individuals were located up to 600 m in the forest interior (S1 Fig). At the regional scale, we sampled *F. insipida* in the eastern sector of Soberanía National Park, close to the town of Gamboa, and in Parque Nacional San Lorenzo on the Caribbean Coast. All sampling sites

were located close to the Panama Canal and spanned a total distance of about 43 km (Fig 1). To test for genetic differentiation over biogeographic scales, we sampled *F. insipida* from Costa Rica and northern Amazonian Peru. In Costa Rica, samples were collected in and around Tirimbina Ecological Reserve in Sarapiquí. In Peru, samples were obtained from sites in the Peruvian regions Loreto and San Martín (see S1 Table for geographic coordinates and numbers of samples for each site).

Leaves were collected either directly from the crown or in a few cases from the ground below the canopy if there were no conspecific trees nearby and if the leaves were still green. All leaf samples were immediately transferred to Ziploc bags containing silica gel. Due to the generally low tree densities and the concentration of most individuals along the shorelines or forest roads, we did not follow a particular sampling scheme [14,27], but rather sampled as many individuals as feasible.

### Ethic statement

Permits for sample collection in protected areas and sample export were obtained from the Autoridad Nacional del Ambiente, Panama (ANAM, Permit No. SC/AP-2-10 and SEX/AP-8-10), Ministerio del Ambiente, Energía y Telecomunicaciones, Costa Rica (MINAET, Permit No. 047-142 2010\_SINAC) and Instituto Nacional de Recursos Naturales, Peru (INRENA, Autorización No. 029 -2004-INRENA-IFFS-DCB).

### Genotyping

DNA was extracted from ca. 10 mg of desiccated leaf tissue using a modified CTAB protocol [28]. We scored 7 to 10 nuclear microsatellite loci for each species (S2 Table) with markers that were developed from an EST library of *F. citrifolia* and *F. popenoei* [29] or were published previously [30,31]. Details on PCR conditions and genotyping are described in Heer et al. [29]. We used one fluorescently labeled primer that could be applied universally with all microsatellites via an attached M13 adaptor sequence [32]. For genotyping, we pooled 2–4 loci using 1  $\mu$ l of each PCR product in 12  $\mu$ l formamide and a ROX500 internal standard (Applied Biosystems, Carlsbad, CA, USA). Genotyping was performed in an ABI Prism 3730 Sequencer. Alleles were scored with GeneMarker V1.97 Demo Version (SoftGenetics, State College, PA, USA). Samples were only included in the final analysis when  $\geq 60\%$  of the loci could be scored. We also tested a number of maternally inherited chloroplast markers (cpSSR) in order to obtain additional information on seed dispersal distances but none of them was polymorphic within the Panama Canal watershed (see S1 Methods for details). *Microsatellite data are within Supporting Information files (S1 Dataset).*

### Genetic Data Analysis

For each species and sampling site we calculated total numbers of alleles ( $N_A$ ), expected heterozygosity ( $H_e$ ), global estimates of  $F_{IS}$  over alleles [33] and tested for deviations from the Hardy-Weinberg equilibrium (HWE) using Genepop 4.1 [34]. Presence of null alleles was determined with MicroChecker 2.2.3 [35]. If null alleles were present, we calculated the mean null allele frequency from the four estimates provided by the software.

For the local scale SGS analyses, we calculated the kinship coefficient  $F_{ij}$  proposed by Loiselle et al. [36] that measures genetic similarity between individuals  $i$  and  $j$  relative to the mean similarity of any random pair of individuals in the sample. This statistic is robust even in the presence of alleles with low frequencies [14]. With the information on spatial and genetic distance between individuals we compared spatial genetic structure among cohorts, populations and species with the  $S_p$  statistic, which is a summary statistic introduced by Vekemans and

Hardy [14]. This statistic largely circumvents the limitations of other methods (e.g. spatial autocorrelation) that are strongly dependent on sampling scheme and arbitrary choice of distance classes. The  $Sp$  statistic is defined as  $Sp = \frac{-b}{(1-F_1)}$  with  $b$  as the slope of the regression of  $F_{ij}$  on  $\ln(d_{ij})$ , the natural logarithm of the spatial distance between individuals, and  $F_1$  being the mean pairwise kinship coefficient of the first distance class that includes nearest neighbors (with  $d_{ij} < 200$  m for free-standing figs and  $d_{ij} < 300$  m for strangler figs taking account of the density of sampled individuals). To determine the significance of  $b$  we conducted 9999 permutations of the spatial positions of all individuals. Standard errors (SE) of  $b$  were approximated by jackknifing. We restricted the range for regression to  $d_{ij} = 0$ –3.0 km, with 3.0 km being the maximum distance of the smallest sampling area (for *F. yoponensis* on BCI). For *F. insipida*, we calculated  $Sp$  for all samples collected in the BCNM and for samples exclusively from BCI to compare them to the results of *F. yoponensis*. We always refer to the  $Sp$  statistics when discussing SGS in this manuscript. When comparing SGS among sampling sites or species we classified differences of  $Sp$  as significant if standard errors ( $\pm 2$  SE) of  $b$  did not overlap.

In order to visualize the data for each species, we plotted mean  $F_{ij}$  for  $n = 5$ –14 distance classes such that the number of pairwise comparisons within each distance interval was approximately constant. This way, the values for the first distance class do not correspond to the  $F_1$  values calculated for the  $Sp$  statistics. We obtained 95% confidence intervals (CI) by permuting  $F_{ij}$  of all pairs of individuals per distance class 9999 times. Standard errors were assessed by jackknifing for each distance class. All calculations were performed with the program SPAGeDi version 1.3d [37]. In addition, we regressed  $F_{ij}$  over  $\ln(d_{ij})$  in R [38] and generated plots with all pairwise comparisons and regression line (S6 Fig).

At larger spatial scales, we used Jost's  $D_{est}$  and  $F_{ST}$  to determine whether there is genetic differentiation among sampling sites of *F. insipida* [39]. Under a model of isolation by distance (IBD) genetic differentiation among populations is expected to increase linearly with distance [40,41]. We used GenAlEx 6.5b3 [42] to calculate pairwise  $D_{est}$  among the sampling sites and SPAGeDI to calculate  $F_{ST}$ . In order to test whether  $D_{est}$  increases significantly with distance we conducted a regression of  $D_{est}$  over distance in R version 3.0.1. To this end, we calculated a mean value across all pairwise comparisons for the Panamanian sampling sites that were not genetically differentiated (one data point) and used the pairwise comparisons among Panama, Costa Rica, Eastern and Western Peru (six data points). Further, we performed a STRUCTURE analysis [43] to test whether individuals from different Panamanian sampling sites could be assigned to one or more clusters based on multi-locus genotype data. We selected the setting with correlated frequencies as it improves estimates of admixture and left all other parameters at their default values [44]. We used 250,000 MCMC repetitions after a burn-in period of 100,000. To determine the most likely number of clusters  $K$ , we tested  $K$  values from 1–10 and carried out 10 runs for each  $K$ . Afterwards, we followed the procedure suggested by Evanno et al. [45] to select the optimal  $K$ . With the same settings, we analyzed all samples from Panama, Costa Rica and Peru with 10 repetitive runs for each  $K = 1$ –7.

Phylogeographic structure can be inferred from the microsatellite DNA data set if allele sizes within a populations or geographic region are more similar than in the overall sample [14]. This was tested by comparing the allele-size based differentiation statistic  $R_{ST}$  with its value after permuting allele sizes within loci ("permuted  $R_{ST}$ "—similar to  $F_{ST}$ ) using SPAGeDI with 10,000 permutations. A significant one-sided test establishes the alternative hypothesis of  $R_{ST} > \text{"permuted } R_{ST}\text{"}$ . Sequential Bonferroni corrections [46] were applied to significance levels of multiple tests.

## Pollen dispersal model

In order to explore the possible role of pollen dispersal limitation in shaping fine scale genetic structure, we designed a computational model using the R programming language [38] that allowed us to estimate the number and distance of possible pollen donors for *F. insipida* trees in the BCNM. Based on the available census data we included all *F. insipida* trees on BCI that were still alive in 2007 and all trees mapped along the shoreline of the islands and peninsulas ( $n = 342$  trees, see S3 Fig).

In the model, each tree undergoes a reproductive cycle that starts at a randomly chosen day of the year. The cycle consists of a receptive phase of six days, a ripening phase of 28 days and a phase of six days during which fig wasps are released and search for fig trees in the receptive phase. The next reproductive cycle starts after a randomly varying period of 228 to 326 days. The model was run for two consecutive cycles for each tree and was repeated ten times. In addition, we repeated the runs with a receptive and release phase of five and seven days, respectively. Trees were classified as potential pollen donors when their release phase overlapped with the receptive phase of another tree, independently of the geographic distance. For each tree we calculated the number of potential pollinators and the Euclidian distance between pollen donor and receptor. Based on these results we estimated the mean number of pollen donors for a number of predefined distance classes. The phenological data for the model was derived from Milton et al. [38,47], Milton [48] and Morrison [24]. We used the R packages “calibrate”, “maptools”, “plotrix” and “sp” [49,50,51,52]. More detailed information on the model is presented as supplementary material (S3 Fig and S2 Methods).

## Results

For each *Ficus* species, we were able to score 7–10 markers with a mean allele number (per locus) of 7.0–10.9 and total allele numbers of 56–109 alleles per species (S2 Table). The number of loci differs between individuals because some of the SSRs did not amplify across all species, had a peak pattern that we could not score reliably, or an excess of null alleles. Null alleles were present in two and three markers for *F. citrifolia* and *F. obtusifolia*, respectively (S2 Table) and markers with null allele frequencies  $> 0.2$  were omitted from the data analysis.

Each sampled individual had a unique multi-locus genotype. All of the species exhibited high levels of heterozygosity (mean  $H_O = 0.58$ – $0.79$ ) and low inbreeding coefficients (mean  $F_{IS} = -0.056$ – $0.054$ ), except for *F. obtusifolia*, which exhibited a relatively high  $F_{IS}$  of 0.146. *Ficus obtusifolia* had an excess of homozygosity in 4 (of 7) loci. Because  $F_{IS}$  is not uniformly high across all loci, we interpret deviations from HWE in the 4 loci as the result of allelic drop-out rather than inbreeding, which would affect all loci. Allele dropout is commonly encountered in microsatellite markers that were not developed for the focal species.

## Spatial genetic structure

For *F. insipida*, we found low but significant SGS in the BCNM ( $Sp = 0.003 \pm 0.002$ ,  $p = 0.011$ , Table 2) and detected comparable values at PLR ( $Sp = 0.0054 \pm 0.0052$ ,  $p < 0.001$ ). Along PLR, SGS was significant in adults ( $Sp = 0.0049 \pm 0.0046$ ,  $p = 0.020$ ), but only marginally significant in saplings ( $Sp = 0.0037 \pm 0.0074$ ,  $p = 0.055$ ).

For the other three fig species we found significant SGS in the BCNM as well. The  $Sp$  statistics revealed strongest SGS for the strangler fig *F. obtusifolia* ( $Sp = 0.031 \pm 0.023$ ,  $p < 0.001$ ) compared to *F. citrifolia* ( $Sp = 0.013 \pm 0.008$ ,  $p < 0.001$ ), *F. yoponensis* ( $Sp = 0.008 \pm 0.012$ ,  $p = 0.032$ ) and *F. insipida*. When comparing  $Sp$  based on the overlap of 2SE, only *F. obtusifolia* and *F. insipida* showed significant differences with much stronger SGS in *F. obtusifolia*. When we restricted analysis for *F. insipida* to trees growing on BCI to better compare it to *F.*

**Table 2. Estimates of SGS based on the  $S_p$  statistics.** With  $b$ : slope of the regression with the correlation coefficient  $r^2$  and  $F_{(1)}$  = kinship coefficient for the first distance class ( $d < 200\text{--}300$  m).

| Species               | Sampling location | $N$ | $F_{(1)}$ | $b$ (For $d_{ij} < 3$ km) | $r^2$ | $S_p \pm 2SE^*$     | $P$     |
|-----------------------|-------------------|-----|-----------|---------------------------|-------|---------------------|---------|
| <i>F. insipida</i>    | BCNM              | 190 | 0.006     | -0.0034                   | 0.001 | 0.0034 $\pm$ 0.0017 | 0.0113  |
|                       | - only BCI        | 88  | 0.004     | -0.0009                   | 0.000 | 0.0009 $\pm$ 0.0026 | 0.2334  |
|                       | - only shoreline  | 102 | 0.013     | -0.0069                   | 0.003 | 0.0070 $\pm$ 0.0049 | 0.0029  |
|                       | PLR               | 155 | 0.019     | -0.0053                   | 0.002 | 0.0054 $\pm$ 0.0052 | < 0.001 |
|                       | - only adults     | 67  | 0.020     | -0.0048                   | 0.002 | 0.0049 $\pm$ 0.0046 | 0.020   |
|                       | - only saplings   | 73  | 0.014     | -0.0037                   | 0.001 | 0.0037 $\pm$ 0.0074 | 0.055   |
| <i>F. citrifolia</i>  | BCNM              | 62  | 0.032     | -0.0128                   | 0.017 | 0.0133 $\pm$ 0.0083 | < 0.001 |
| <i>F. obtusifolia</i> | BCNM              | 59  | 0.097     | -0.0281                   | 0.034 | 0.0311 $\pm$ 0.0228 | < 0.001 |
| <i>F. yoponensis</i>  | BCI               | 37  | 0.014     | -0.0082                   | 0.005 | 0.0083 $\pm$ 0.0124 | 0.032   |

\* Standard errors (SE) are based on jackknifing

doi:10.1371/journal.pone.0133581.t002

*yoponensis*, we found no significant SGS ( $S_p = 0.001 \pm 0.003$ , ns). To exclude the possible of null alleles affecting these results, we repeated the analysis by omitting markers with null alleles (S2 Table). This did not alter the results significantly.

The autocorrelation analysis largely supported the finding of significant SGS and indicated that pairwise kinship was higher than expected under conditions of random pollen and seed dispersal (reflected by the 95% CI) for distance classes up to 1 km in *F. insipida* (Fig 2). For both strangler figs the pairwise kinship coefficient of the first distance class (mean pairwise distance < 500 m) was significant. In *F. yoponensis*, the autocorrelations was not significant, but  $F_{ij}$  decreases with increasing distance as well except for the first distance class.

### Pollen dispersal model

When the receptive and release phase in our model were set to six days, we found that 48 out of 342 *F. insipida* trees had no potential mate within a radius of 500 m (mean number of mating partners < 500 m:  $1.7 \pm 1.0$ ). On average,  $4.0 \pm 2.1$  potential pollen donors could be encountered within a radius of 1 km in our simulations (Fig 3). In total, each receptive tree could potentially receive pollen from  $25.8 \pm 2.3$  trees in our simulation. Mean distance between potential mating partners was  $3.0 \pm 0.5$  km. If the receptive and release phase lasted for five or seven days, mean number of pollen donors decreased by 13% and increased by 14%, respectively (S4 Fig).

### Genetic differentiation of *F. insipida* at regional and biogeographic spatial scales

At the regional scale, genetic differentiation among sampling sites located along the Panama Canal was low ( $D_{est} = 0.009 \pm 0.006$ ,  $F_{ST} = 0.006 \pm 0.004$ ) and did not increase with distance. The STRUCTURE analysis detected only one cluster in this entire area. In contrast, at the biogeographic scale (Costa Rica to Peru) we found a strong linear correlation of  $D_{est}$  over linear Euclidian distance (adjusted  $R^2 = 0.962$ ,  $p < 0.001$ , Fig 4, corresponding  $F_{ST}$  in Table 3). The most likely number of clusters of the corresponding STRUCTURE analysis was  $K = 2$  separating the samples from Peru and Central America. However, the Evanno method has a strong bias to identify  $K = 2$  as the most likely number due to the low variance of  $K = 1$  [53]. Thus, we also assessed the second most likely number of clusters, which was  $K = 5$ . In that case, the



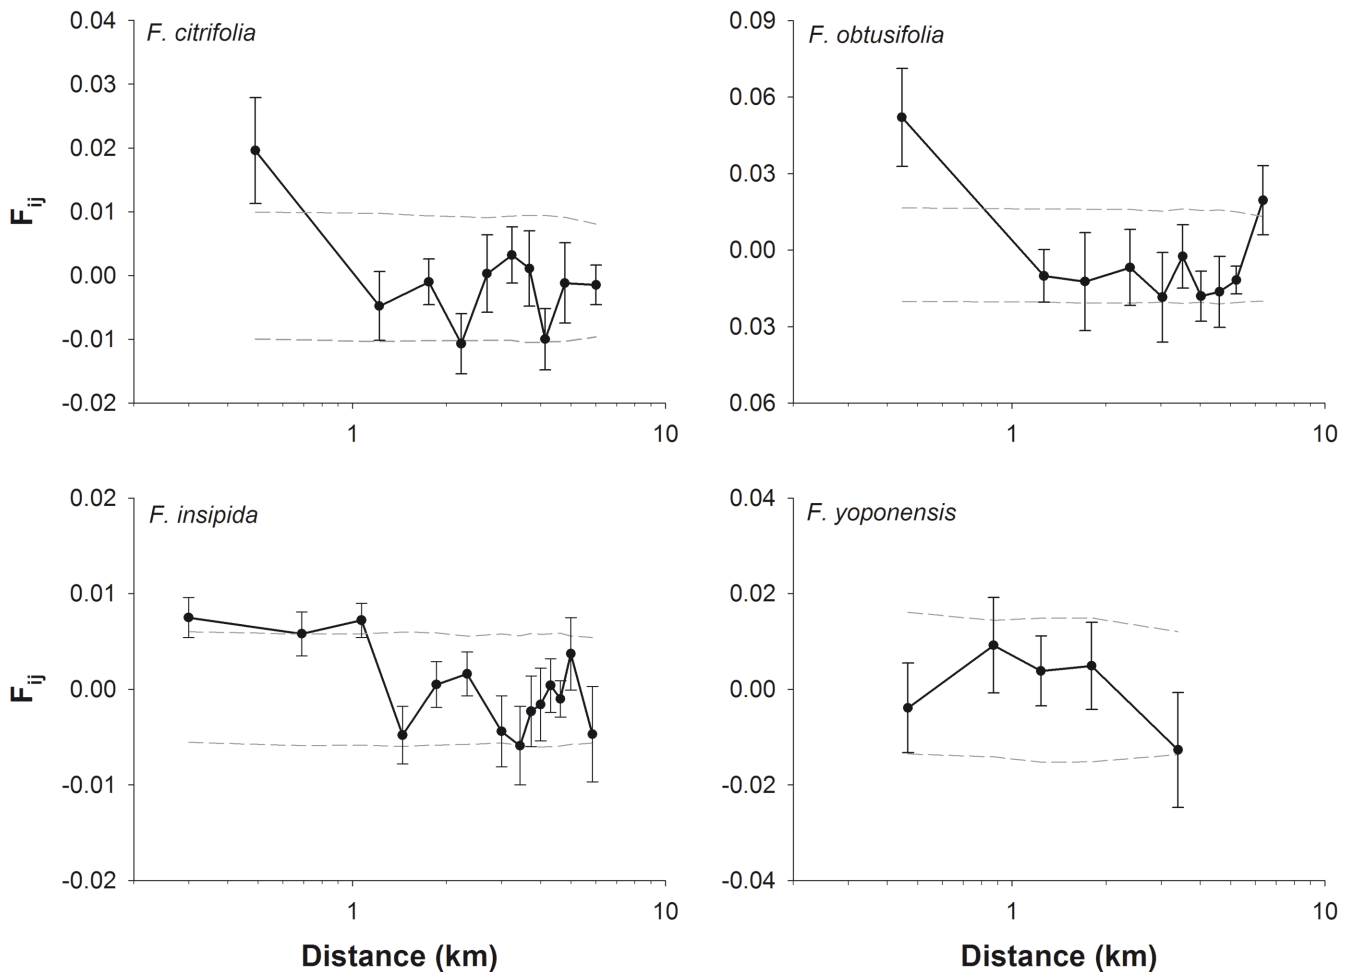

**Fig 2. Average kinship over distance for the investigated fig species.** Pairwise kinship is determined by Loiselle’s kinship coefficient ( $F_{ij}$ ) for *F. citrifolia* ( $n_{ind} = 62$ ,  $n_{comp} = 236$ ), *F. obtusifolia* ( $n_{ind} = 59$ ,  $n_{comp} = 214$ ), *F. insipida* ( $n_{ind} = 190$ ,  $n_{comp} = 1795$ ) and *F. yoponensis* ( $n_{ind} = 37$ ,  $n_{comp} = 133$ ). Dotted lines represent 95% confidence interval. Depending on the pairwise kinship, scales on the y axis vary among graphs. ( $n_{ind}$  = number of sampled individuals,  $n_{comp}$  = number of pairwise comparisons per distance class).

doi:10.1371/journal.pone.0133581.g002

samples from Peru and Costa Rica clustered separately while individuals from Panama were jointly assigned to three clusters (S2 Fig).

The phylogeographic analysis based on microsatellite size variation showed significant difference between  $R_{ST}$  and permuted  $R_{ST}$  only in comparisons between Central America (Costa Rica or Panama) and Peru ( $P < 0.01$ ) (Table 3). There was no significant contribution of allele size mutation to population differentiation within Central America or within Peru.

## Discussion

We collected nuclear microsatellite data to estimate genetic structure at different spatial scales in the common free-standing fig *F. insipida*. Significant genetic differentiation among Mesoamerican and Amazonian sites indicates that pollen dispersal is restricted over biogeographic scales. At the local scale we detected weak but significant SGS in *F. insipida* as well as in three other sympatric fig species from both New World subgenera *Pharmacosycea* (free-standing figs) and *Urostigma* section *Americana* (strangler figs). Our model results were consistent with previous genetic studies [Z] that showed that pollen dispersal routinely exceeds the area within

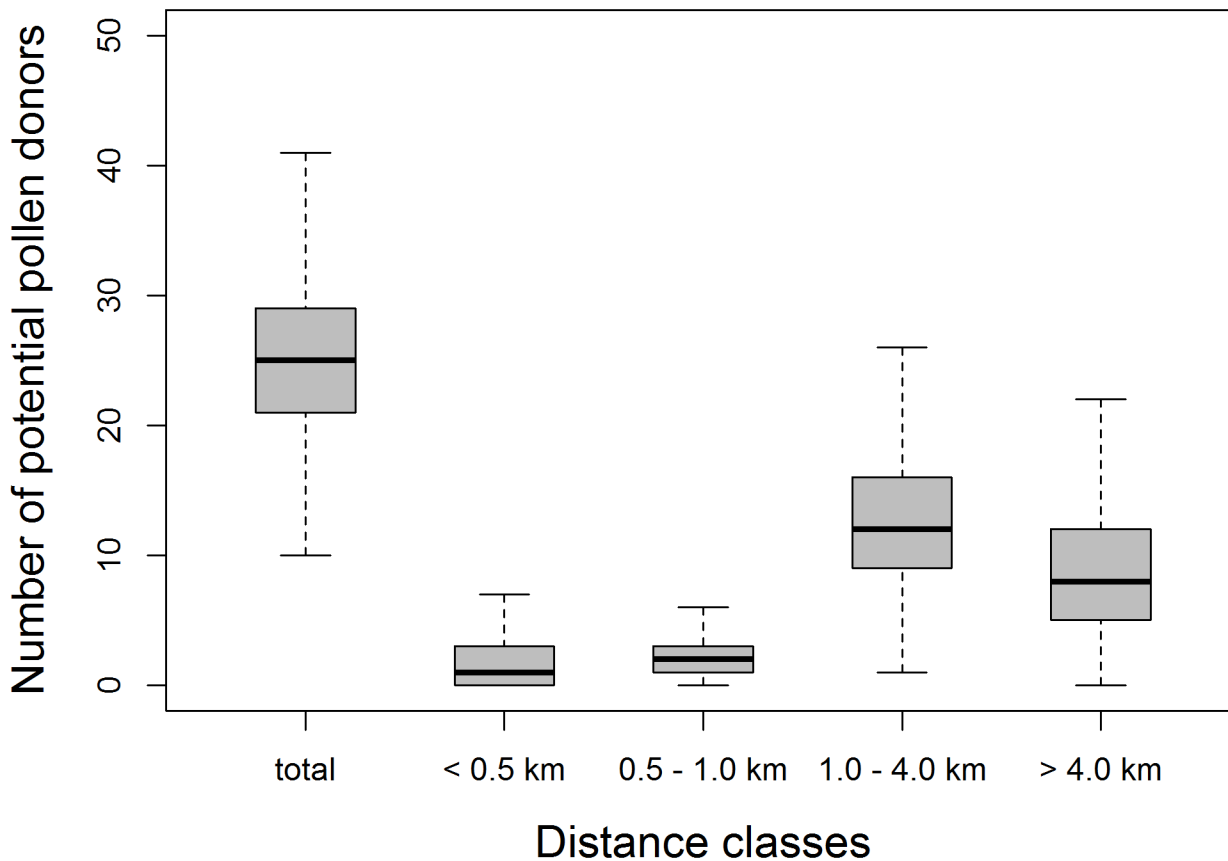

**Fig 3. Simulation results of the pollen dispersal model.** Results are based on simulations with a receptive and release phase of six days. Boxplots represent the number of trees that can act as potential pollen for each receptive *F. insipida* tree at the given distance classes. Results are based on 10 runs.

doi:10.1371/journal.pone.0133581.g003

which we estimated SGS. Thus, our results suggest that local scale SGS results from relatively limited seed dispersal in Neotropical figs. In the following, we explore key processes that influence the formation of SGS in Neotropical figs and relate SGS at the local scale to patterns of geographic differentiation.

Figs exhibit the highest pollination distances known in insect-pollinated plants [3]. In Panama, fig wasps often need to travel hundreds to thousands of meters to encounter a receptive conspecific host plant. Individual figs routinely receive pollen from multiple genetically distinct pollen sources that can be dozens of kilometers apart [7]. Asynchronous mating further reduces the frequency of nearest neighbor pollination. In accordance with this, we observed high  $H_O$  and low  $F_{IS}$  values in our study which indicate high levels of random mating. Our model results using data from *F. insipida* are consistent with Nason et al.'s [7] findings with stranglers: only very few pollen donors are routinely located among the nearest neighbors of a receptive fig tree: For 44% of the modeled trees 0–1 potential pollen donors were located within a radius of 500 m, while a much larger number of pollen donors was located beyond 1 km (84.5% of all potential fathers in our model), far exceeding the spatial scale of the fine scale SGS in our study. Our model likely underestimates the number of pollen donors at larger distances because it is restricted to the area of BCNM. As we do not integrate wind speed and direction, we probably overestimate the number of pollen donors at short distances. Nevertheless, our estimate demonstrates that close neighbor mating plays a minor role in pollen mediated gene flow and thus, is unlikely to generate local scale SGS. Our pollination model is likely to apply

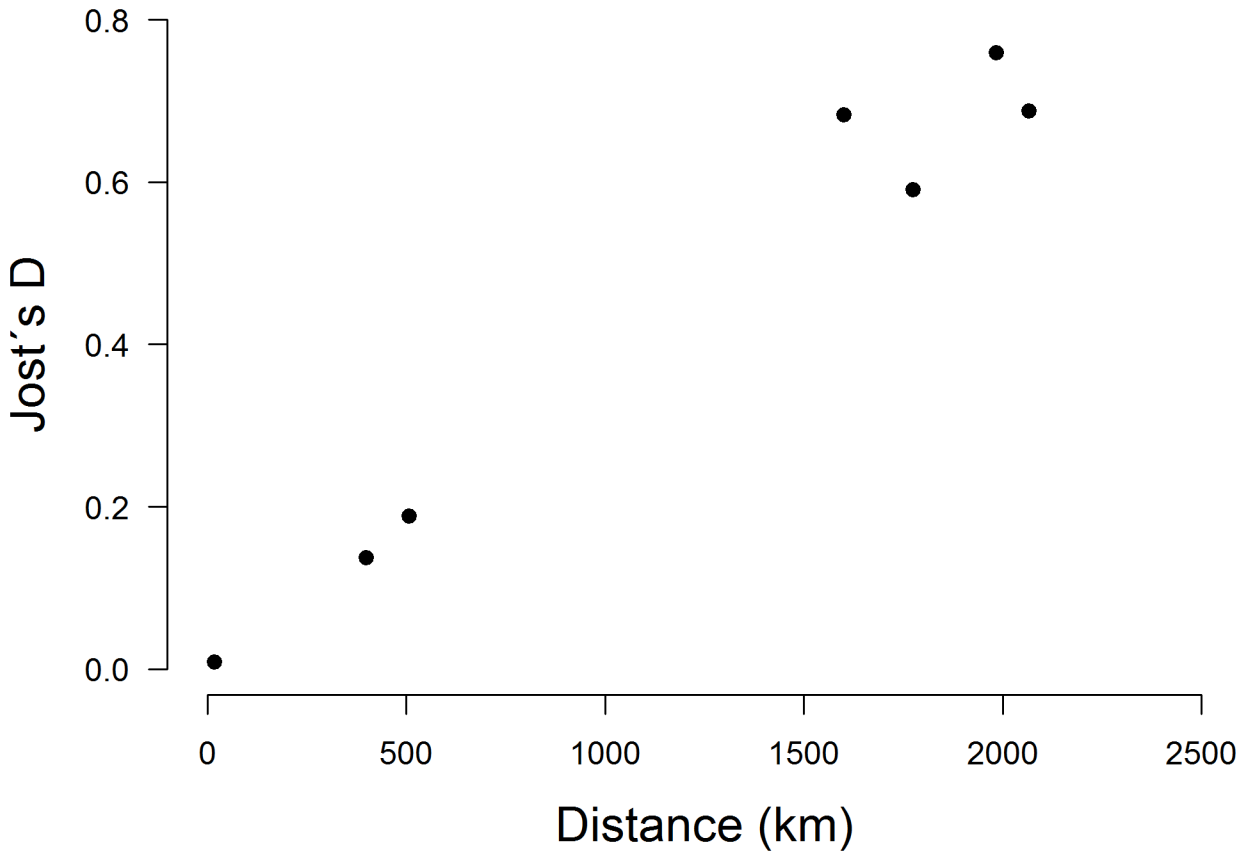

**Fig 4. Genetic differentiation among *F. insipida* sampling sites located in Panama, Costa Rica and Peru.** Genetic differentiation given as Jost's  $D_{est}$  increases linearly with spatial distance as expected under IBD or IBB (adjusted  $R^2 = 0.962$ ,  $p < 0.001$ ). As there was no population substructure among Panamanian sampling sites, they are represented by one data point at short distance while the other data points are pairwise comparisons among Panama, Costa Rica, Western and Eastern Peru.

doi:10.1371/journal.pone.0133581.g004

broadly to Neotropical fig species, most of which occur at even lower densities than *F. insipida* yet have similar asynchronous flowering patterns.

While long distance pollen dispersal is a common feature in Neotropical figs, SGS patterns may vary predictably among Neotropical *Ficus* species for other reasons, including life history differences associated with fruit size, and differences in habitat requirements for seedling establishment, both of which we explore in the following paragraphs. As any measure of SGS will only provide a temporally and spatially restricted snapshot, we also discuss the potential influences of colonization history and fluctuations in population density on SGS of the studied fig populations.

**Table 3. Pairwise measures of genetic differentiation between *F. insipida* populations.**  $F_{ST}$  (above diagonal) and  $R_{ST}$  (below diagonal). If  $R_{ST} >$  permuted  $R_{ST}$ , it is indicative for the contribution of mutations to population differentiation (for  $p < 0.05$  after correction for multiple testing indicated by bold numbers).

|              | Panama       | Costa Rica   | Western Peru | Eastern Peru |
|--------------|--------------|--------------|--------------|--------------|
| Panama       | -            | 0.121        | 0.261        | 0.281        |
| Costa Rica   | 0.129        | -            | 0.324        | 0.323        |
| Western Peru | <b>0.441</b> | <b>0.500</b> | -            | 0.049        |
| Eastern Peru | <b>0.533</b> | <b>0.552</b> | 0.030        | -            |

doi:10.1371/journal.pone.0133581.t003

## Regeneration ecology, colonization history and SGS

While fig species mostly occur at low densities, free-standing figs might occur—temporally and/or locally restricted—at higher densities, especially in former disturbed areas and light gaps [26]. The intensity of SGS can depend on the degree to which large light gaps are colonized by seeds from multiple sources [54]. The relatively low SGS observed in *F. insipida* in our study, coupled to the fact that SGS is not significant even in saplings, suggests that light gaps are being seeded by multiple maternal sources. As free-standing figs are most dominant in early successional stages of forests, colonization history has to be considered as well. The northwestern part of BCI experienced a long history of agricultural use and the forest only began to regenerate about 150 years ago. Almost all *F. insipida* and *F. yoponensis* trees on BCI are restricted to this secondary forest [26]. Most free-standing *Ficus* trees established in early successional stages and appear to be the same age on BCI. As the forest matured, further recruitment was impeded by low light conditions under the canopy cover and, currently, sapling *Ficus* trees are extremely rare in BCI's closed canopy forest [26,55]. Regular census data since 1973 has shown a drastic decline of both studied free-standing fig species on the island in recent years (Albrecht et al. unpublished data, [24]) indicating that the trees have reached the end of their natural life spans. Thus the absence of SGS in *F. insipida* on BCI (S5 Fig) could be attributed to the fact that trees established almost simultaneously from multiple seed sources that were likely growing at the edge of the agricultural fields. Initial patterns of SGS would then be weakened by demographic thinning [56]. In contrast, seeds of strangler figs mostly establish in the canopies of other host trees, and they should encounter evenly scattered germination sites within intact forest. A relatively random distribution of fig trees at low density, such as is observed in the stranglers, should increase SGS because seed shadow overlap is expected to be relatively low [14]. We expect that future studies will find similar differences in the intensity of SGS between strangler and free-standing figs due to their fundamentally different requirements for seedling establishment.

## Influence of frugivore size and dispersal on SGS

While howler monkeys and frugivorous birds visit fruiting figs trees during daytime [57,58], in BCNM, fruit-eating bats of the family Phyllostomidae disperse more than 80% of the seeds of the studied fig species [23,59]. Bat-mediated seed dispersal distances are unknown due to the observational challenges posed by the high mobility and nocturnal lifestyle of bats. Although fruit-eating phyllostomid bats are generally regarded as potential long distance seed dispersers [60,61], several factors may limit their effective dispersal distances. After picking a fruit, these bats usually fly to temporary feeding roosts located within 50–200 m of the fruiting tree [62]. This behavior appears to be a response to predators that also congregate at ripe fig trees [62]. Ingested seeds are not likely to travel far as bats have short gut passage time for seeds (< 30 min) [63] which leaves germination rate of seeds largely unaffected [60]. Based on this, we expect that most fig seeds will be dropped below or near these temporary feeding roosts close to the maternal fig tree. Larger fig fruits are generally consumed by bat species with larger body size [64,65,66] that are more likely to disperse seeds over longer distances due to their higher mobility. According to that rationale, *F. insipida* and *F. obtusifolia* should be dispersed over larger distances and exhibit lower SGS (see Table 1 for fruit sizes). However, we found the lowest SGS in *F. insipida* and the highest in *F. obtusifolia* (Table 2). We conclude that measurable differences in seed dispersal distances are either not significant among fig species or that their effects on local SGS are overwhelmed by other factors. While encountering seeds dispersed by fruit-eating bats is not an easy task, genetic parentage analyses of fig seeds deposited under feeding roosts could provide the first empirical data on seed dispersal distance by fruit-eating bats.

Our results of low but significant SGS are also consistent with those of Nazareno et al. [12] who studied SGS in populations of *F. citrifolia* and *F. eximia*. It is also interesting to note that despite the extraordinary pollen dispersal distances documented in figs, other tropical species that are pollinated by insects and dispersed by animals show similar levels of SGS based on the  $S_p$  statistics as the figs from our study (compare [2,67]). We suggest that the observed SGS values in our study are primarily shaped by differences in tree density, and the interplay between regeneration strategies, colonization history, and average seed dispersal distances. However, while SGS measured with the  $S_p$  statistics is generally considered robust across different sampling schemes [14], we recognize that SGS can also be influenced by population dynamics and idiosyncratic population histories [68] that may obscure more deterministic differences in SGS caused by life history.

### Regional and phylogeographic genetic structure of *F. insipida*

At the regional scale within the Panama Canal watershed we detected no population substructure for *F. insipida* despite the spatial limitations of seed dispersal that likely generated SGS at the local scale. This is consistent with prior estimates of breeding area based on pollen dispersal studies for strangler figs [7]. At the biogeographic scale, we found that populations were genetically distinct and genetic differentiation increased with distance as predicted under conditions of isolation by distance (IBD) and/or isolation by geographic barriers (IBB) [69] (Table 3). The geographic barriers separating our population samples from Costa Rica to Peru include the northern Andes, the dry Llanos region of northern South America, and various xeric and montane barriers between the Panamanian and Costa Rican sites. While the summary statistics  $F_{ST}$ ,  $R_{ST}$  and  $D_{est}$  only permit a *post hoc* interpretation, the phylogeographic structure of *F. insipida* detected between our Central and South American samples is consistent with the previously published cpDNA phylogeography [18] of the same species. Because the phylogeographic structure was stronger in the maternally transmitted cpDNA than in ITS, Honorio Coronado and colleagues [18] suggested that the geographic barriers associated with the northern Andes posed a greater barrier for seed than pollen dispersal. This pattern may have other explanations. The haploid, uniparentally transmitted chloroplast genome has a lower  $N_e$  (1/4 the  $N_e$  of nuclear markers) and genetic drift therefore plays a much stronger role in cpDNA markers. Chloroplast capture from congeneric species is also possible, and has been demonstrated in *Ficus* and other tree taxa [70,71]. The absence of ITS variation between Panama and Amazonian *Ficus* [18] is among the lowest levels of divergence found in lowland trees sampled on either side of the Andes [72,73,74,75] and is most similar to species that have relatively recently dispersed around the Andes [76]. This suggests fig seed dispersal and/or colonization ability (especially in drier habitats) has allowed *F. insipida*, and perhaps other fig species, to overcome the geographic barriers that have caused vicariance in many other tree species.

### Conclusions

Neotropical fig species exhibit local spatial genetic structure despite frequent long pollen dispersal distances. The most likely underlying cause is limited seed dispersal, with fruit-eating Phyllostomid bat species being the most likely seed dispersers of the studied *Ficus* species in BCNM. In addition, different regeneration strategies of free-standing vs. strangler figs may cause differences in the degree of SGS. Nevertheless, gene flow over large distances is maintained via pollen dispersal and our study of meso-scale genetic structure in *F. insipida* confirmed that breeding populations cover large areas such as the entire watershed of the Panama Canal. Yet, at biogeographic spatial scales, genetic differentiation among regions becomes apparent, and is likely caused by a combination of IBD and IBB. Further studies are needed to

test the emerging pattern of greater gene flow in monoecious than in dioecious species (this study and [11,12,77]). Importantly, species-specific traits (e.g. requirements for seedling recruitment) as well as the behavior of both pollen and seed dispersal agents have to be considered when predicting the spatial extent of gene flow in figs and other tree taxa.

## Supporting Information

### S1 Dataset. SSR raw data for all individuals.

(XLSX)

**S1 Fig. *Ficus* sampling in the Barro Colorado Nature Monument, Panama (top rows) and along Pipeline Road (bottom row) for the assessment of SGS.** Shown are all sampled individuals of *F. insipida*, *F. yoponensis*, *F. citrifolia* and *F. obtusifolia*.

(PNG)

**S2 Fig. Assignment of samples from Panama (n = 429), Costa Rica (n = 27) and Peru (n = 27) to cluster with the Structure software.** The most likely number of cluster was  $K = 5$  where samples from Peru and Costa Rica were assigned to separate clusters while samples from Panama were jointly assigned to three clusters. The graph was based on the run that had the highest  $\ln P(D)$  value with  $K = 5$ .

(PNG)

**S3 Fig. Map of the BCNM with all *F. insipida* trees mapped on BCI and the surrounding islands and peninsulas that were integrated in the pollen flow model (n = 342, all dots).**

Here, tree 54 (blue dot) is in its receptive phase and all trees highlighted in red release fig wasps at a given day. Blue circles around tree 54 indicate the distance classes (< 500 m, 501–1,000 m, 1,001–4,000 m).

(PNG)

**S4 Fig. Number of trees that can act as potential pollen donors in the pollen dispersal model for *F. insipida*.** Boxplots are based on 10 runs where the release and receptive phase last for five (A) and seven (B) days each.

(TIF)

**S5 Fig. Average kinship over distance for the *F. insipida* along the shoreline of BCNM ( $n_{\text{ind}} = 102$ ,  $n_{\text{comp}} = 515$ ) and on BCI ( $n_{\text{ind}} = 88$ ,  $n_{\text{comp}} = 478$ ).** Pairwise kinship is determined by Loiselle's kinship coefficient ( $F_{ij}$ ). Dotted lines represent 95% confidence interval. Depending on the spatial scale the x axes vary between graphs. ( $n_{\text{ind}}$  = number of sampled individuals,  $n_{\text{comp}}$  = number of pairwise comparisons per distance class).

(TIF)

**S6 Fig. Regression of  $F_{ij}$  over  $\ln(d_{ij})$  for the four sampled species.** Regression is based on all pairwise comparisons within a radius of 3 km. Regression was performed in R using a linear model. Within each graph,  $r^2$ , the regression slope  $b$  and  $p$  are indicated (number of pairwise comparisons for each species:  $F_{\text{cit}} = 962$ ,  $F_{\text{ins}} = 7764$ ,  $F_{\text{obt}} = 761$  and  $F_{\text{yop}} = 664$ ).

(TIFF)

**S1 Methods. Methods for chloroplast SSRs.** With Table A: Allele length for the tested cpSSRs from Weising & Gardner (1999).

(DOCX)

**S2 Methods. Specifications of the pollen dispersal model.**

(DOCX)

**S1 Table. Sampling sites of *F. inspida* in Panama, Costa Rica and Peru with the number of samples per plot (n) and the spatial coordinates of the locality.**

(DOCX)

**S2 Table. Characterization of the microsatellite markers for *Ficus* samples collected in the Barro Colorado Nature Monument.** For each marker, we provide the percentage of missing data, the number of alleles ( $N_a$ ), the expected heterozygosity ( $H_e$ ) and the inbreeding coefficient ( $F_{IS}$ ).

(DOCX)

## Acknowledgments

We thank J. Choo, A. Thompson, Na Wei and S. Abraham for support in the laboratory and A. Gomez and L.T. Montenegro for help in the field. We are grateful to O. Hardy for support when using SPAGeDi and to M. Heuertz and S.C. Gonzalez-Martinez for help with the data analysis. We thank M. Tschapka and M. Ayasse, and the anonymous reviewers that greatly helped to improve the manuscript.

## Author Contributions

Conceived and designed the experiments: KH CWD EKVK. Performed the experiments: KH LA FCS RGV. Analyzed the data: KH FCS. Contributed reagents/materials/analysis tools: KH LA FCS RGV CWD. Wrote the paper: KH CWD EAH.

## References

1. Bawa KS (1990) Plant-pollinator interactions in tropical rainforests. *Annu Rev Ecol Syst* 21: 399–422.
2. Dick CW, Hardy OJ, Jones FA, Petit RJ (2008) Spatial scales of pollen and seed-mediated gene flow in tropical rain forest trees. *Tro Plant Biol* 1: 20–33.
3. Ahmed S, Compton SG, Butlin RK, Gilmartin PM (2009) Wind-borne insects mediate directional pollen transfer between desert fig trees 160 kilometers apart. *Proc Natl Acad Sci USA* 106: 20342–20347. doi: [10.1073/pnas.0902213106](https://doi.org/10.1073/pnas.0902213106) PMID: [19910534](https://pubmed.ncbi.nlm.nih.gov/19910534/)
4. Herre EA, Jander KC, Machado CA (2008) Evolutionary ecology of figs and their associates: Recent progress and outstanding puzzles. *Annu Rev Ecol Evol Syst* 39: 439–458.
5. Machado CA, Robbins N, Gilbert MTP, Herre EA (2005) Critical review of host specificity and its coevolutionary implications in the fig/fig-wasp mutualism. *Proc Natl Acad Sci USA* 102: 6558–6565. PMID: [15851680](https://pubmed.ncbi.nlm.nih.gov/15851680/)
6. Jackson AP, Machado CA, Robbins N, Herre EA (2008) Multi-locus phylogenetic analysis of neotropical figs does not support co-speciation with the pollinators: The importance of systematic scale in fig/wasp cophylogenetic studies. *Symbiosis* 45: 57–72.
7. Nason JD, Herre EA, Hamrick JL (1998) The breeding structure of a tropical keystone plant resource. *Nature* 391: 685–687.
8. Janzen DH (1979) How to be a fig. *Annu Rev Ecol Syst* 10: 13–52.
9. Valdeyron G, Kjellberg F, Ibrahim M, Raymond M, Valizadeh M (1985) A one species—one population plant: how does the common fig escape genetic diversification? In: Jacquard P, Heim G, Antonovics J, editors. *Genetic differentiation and dispersal in plants*. Berlin: Springer Verlag, pp. 383–393.
10. Harrison RD, Rasplus JY (2006) Dispersal of fig pollinators in Asian tropical rain forests. *J Trop Ecol* 22: 631–639.
11. Dev SA, Kjellberg F, Hossaert-McKey M, Borges RM (2010) Fine-scale population genetic structure of two dioecious Indian keystone species, *Ficus hispida* and *Ficus exasperata* (Moraceae). *Biotropica* 43: 309–316.
12. Nazareno AG, Alzate-Marin AL, Pereira RAS (2013) Dioecy, more than monoecy, affects plant spatial genetic structure: the case study of *Ficus*. *Eco Evol* 3: 3495–3508.
13. Compton SG, Ellwood MDF, Davis AJ, Welch K (2000) The flight heights of chalcid wasps (Hymenoptera, Chalcidoidea) in a lowland Bornean rain forest: Fig wasps are the high fliers. *Biotropica* 32: 515–522.

14. Vekemans X, Hardy OJ (2004) New insights from fine-scale spatial genetic structure analyses in plant populations. *Mol Ecol* 13: 921–935. PMID: [15012766](#)
15. Banack SA, Horn MH, Gawlicka A (2002) Disperser- vs. establishment-limited distribution of a riparian fig tree (*Ficus insipida*) in a Costa Rican tropical rain forest. *Biotropica* 34: 232–243.
16. Yu H, Nason JD, Ge X, Zeng J (2010) Slatkin's Paradox: When direct observation and realized gene flow disagree. A case study in *Ficus*. *Mol Ecol* 19: 4441–4453. doi: [10.1111/j.1365-294X.2010.04777.x](#) PMID: [20840599](#)
17. Chen Y, Jiang Z-X, Compton SG, Liu M, Chen X-Y (2011) Genetic diversity and differentiation of the extremely dwarf *Ficus tikoua* in Southwestern China. *Biochem Syst Ecol* 39: 441–448.
18. Honorio Coronado EN, Dexter KG, Poelchau MF, Hollingsworth PM, Phillips OL, Pennington RT (2014) *Ficus insipida* subsp. *insipida* (Moraceae) reveals the role of ecology in the phylogeography of wide-spread Neotropical rain forest tree species. *J Biogeogr* 41: 1697–1709. PMID: [25821341](#)
19. Berg CC (1989) Classification and distribution of *Ficus*. *Experientia* 45: 605–611.
20. Shanahan M, So S, Compton SG, Corlett R (2001) Fig-eating by vertebrate frugivores: a global review. *Biol Rev* 76: 529–572. PMID: [11762492](#)
21. Harrison RD (2005) Figs and the diversity of tropical rainforests. *Bioscience* 55: 1053–1064.
22. Cruaud A, Rønsted N, Chantarasuwan B, Chou LS, Clement WL, Couloux A, et al. (2012) An extreme case of plant-insect co-diversification: figs and fig-pollinating wasps. *Syst Biol* 61: 1029–1047. doi: [10.1093/sysbio/sys068](#) PMID: [22848088](#)
23. Korine C, Kalko EKV, Herre EA (2000) Fruit characteristics and factors affecting fruit removal in a Panamanian community of strangler figs. *Oecologia* 123: 560–568.
24. Morrison DW (1978) Foraging ecology and energetics of the frugivorous bat *Artibeus jamaicensis*. *Ecology* 59: 716–723.
25. Windsor DM, Morrison DW, Estribi MA, de Leon B (1989) Phenology of fruit and leaf production by 'strangler' figs on Barro Colorado Island, Panamá. *Experientia* 45: 647–653.
26. Foster RB, Brokaw NVL (1982) Structure and history of the vegetation of Barro Colorado Island. In: Leigh EG Jr, Rand AS, Windsor DM, editors. *The ecology of a tropical forest: Seasonal rhythms and long-term changes*. Washington, D.C.: Smithsonian Institution Press. pp. 67–94.
27. Cavers S, Degen B, Caron H, Lemes MR, Margis R, Salgueiro F, et al. (2005) Optimal sampling strategy for estimation of spatial genetic structure in tree populations. *Heredity* 95: 281–289. PMID: [16030529](#)
28. Doyle J, Doyle JL (1987) Genomic plant DNA preparation from fresh tissue—CTAB method. *Phytochem Bull* 19: 11–15.
29. Heer K, Machado CA, Himler AG, Herre EA, Kalko EKV, Dick CW (2012) Anonymous and EST-based Microsatellite DNA markers that transfer broadly across the fig tree genus (*Ficus* L. Moraceae). *Am J Bot* 99: e330–e333 doi: [10.3732/ajb.1200032](#) PMID: [22847539](#)
30. Crozier YC, Jia XC, Yao JY, Field AR, Cook JM, Crozier RH (2007) Microsatellite primers for *Ficus racemosa* and *Ficus rubiginosa*. *Mol Ecol Notes* 7: 57–59.
31. Vignes H, Hossaert-Mckey M, Beaune D, Fevre D, Anstett MC, Borges RM, et al. (2006) Development and characterization of microsatellite markers for a monoecious *Ficus* species, *Ficus insipida*, and cross-species amplification among different sections of *Ficus*. *Mol Ecol Notes* 6: 792–795.
32. Schuelke M (2000) An economic method for the fluorescent labeling of PCR fragments. *Nat Biotechnol* 18: 233–234. PMID: [10657137](#)
33. Weir BS, Cockerham CC (1984) Estimating F-statistics for the analysis of population structure. *Evolution* 38: 1358–1370.
34. Rousset F (2008) genepop'007: a complete re-implementation of the genepop software for Windows and Linux. *Mol Ecol Res* 8: 103–106.
35. Van Oosterhout C, Hutchinson WF, Wills DPM, Shipley P (2004) micro-checker: software for identifying and correcting genotyping errors in microsatellite data. *Mol Ecol Notes* 4: 535–538.
36. Loiselle BA, Sork VL, Nason J, Graham C (1995) Spatial genetic structure of a tropical understory shrub, *Psychotria officinalis* (Rubiaceae). *Am J Bot* 82: 1420–1425.
37. Hardy OJ, Vekemans X (2002) SPAGeDI: a versatile computer program to analyse spatial genetic structure at the individual or population levels. *Mol Ecol Notes* 2002: 618–620.
38. R Core Team (2014) R: A language and environment for statistical computing. R Foundation for Statistical Computing, Vienna, Austria. URL <http://www.R-project.org/>.
39. Jost L (2008) GST and its relatives do not measure differentiation. *Mol Ecol* 17: 4015–4026. PMID: [19238703](#)



40. Wright S (1943) Isolation by distance. *Genetics* 28: 114–137. PMID: [17247074](#)
41. Holsinger KE, Weir BS (2009) Genetics in geographically structured populations: Defining, estimating and interpreting  $F_{ST}$ . *Nat Rev Genet* 10: 639–650. doi: [10.1038/nrg2611](#) PMID: [19687804](#)
42. Peakall R, Smouse P (2012) GenAlEx 6.5: Genetic analysis in Excel. Population genetic software for teaching and research—an update. *Bioinformatics* 28: 2537–2539. PMID: [22820204](#)
43. Pritchard JK, Stephens M, Donnelly P (2000) Inference of population structure using multilocus genotype data. *Genetics* 155: 945–959. PMID: [10835412](#)
44. Falush D, Stephens M, Pritchard JK (2007) Inference of population structure using multilocus genotype data: Dominant markers and null alleles. *Mol Ecol Notes* 7: 574–578. PMID: [18784791](#)
45. Evanno G, Regnaut S, Goudet J (2005) Detecting the number of clusters of individuals using the software STRUCTURE: A simulation study. *Mol Ecol* 14: 2611–2620. PMID: [15969739](#)
46. Rice WR (1989) Analyzing tables of statistical tests. *Evolution*: 223–225.
47. Milton K, Windsor DM, Morrison DW, Estribi MA (1982) Fruiting phenologies of two neotropical *Ficus* species. *Ecology* 63: 752–762.
48. Milton K (1991) Leaf change and fruit production in six neotropical Moraceae species. *J Ecol* 79: 1–26.
49. Pebesma EJ, Bivand RS (2005) Classes and methods for spatial data in R. *R News* 5: 9–13.
50. Lemon J (2006) Plotrix: a package in the red light district of R. *R news* 6: 8–12.
51. Lewin-Koh NJ, Bivand R, Pebesma E, Archer E, Baddeley A, Bibiko H, et al. (2011) maptools: Tools for reading and handling spatial objects. R package version 0.8–10 URL <http://CRAN.R-project.org/package=maptools>.
52. Graffelman J (2009) A guide to scatterplot and biplot calibration.
53. Campana MG, Hunt HV, Jones H, White J (2011) CorrSieve: software for summarizing and evaluating Structure output. *Mol Ecol Res* 11: 349–352.
54. Born CI, Kjellberg F, Chevallier M-Hln, Vignes Hln, Dikangadissi J-T, Sanguié J, et al. (2008) Colonization processes and the maintenance of genetic diversity: insights from a pioneer rainforest tree, *Aucoumea klaineana*. *Proc Roy Soc B* 275: 2171–2179.
55. Terborgh J, Flores N C, Mueller P, Davenport L (1997) Estimating the ages of successional stands of tropical trees from growth increments. *J Trop Ecol* 13: 833–856.
56. Pardini EA, Hamrick JL (2008) Inferring recruitment history from spatial genetic structure within populations of the colonizing tree *Albizia julibrissin* (Fabaceae). *Mol Ecol* 17: 2865–2879. doi: [10.1111/j.1365-294X.2008.03807.x](#) PMID: [18510586](#)
57. Serio-Silva JC, Rico-Gray V (2002) Interacting effects of forest fragmentation and howler monkey foraging on germination and dispersal of fig seeds. *Oryx* 36: 266–271.
58. Vanderhoff EN, Grafton B (2009) Behavior of tamarins, tanagers and manakins foraging in a strangler fig (*Ficus* sp.) in Suriname, South America: implications for seed dispersal. *Biota Neotropica* 9: 419–423.
59. Heer K, Albrecht L, Kalko EKV (2010) Effects of ingestion by neotropical bats on germination parameters of native free-standing and strangler figs (*Ficus* sp., Moraceae) *Oecologia* 163: 425–436. doi: [10.1007/s00442-010-1600-x](#) PMID: [20354732](#)
60. Morrison DW (1978) Influence of habitat on the foraging distances of the fruit bat, *Artibeus jamaicensis*. *J Mammal* 59: 622–624.
61. Thornton IWB, Compton SG, Wilson CN (1996) The role of animals in the colonization of the Krakatau Islands by fig trees (*Ficus* species). *J Biogeogr* 23: 577–592.
62. Morrison DW (1980) Foraging and day-roosting dynamics of canopy fruit bats in Panama. *J Mammal* 61: 22–29.
63. Laska M (1990) Food transit times and carbohydrate use in three phyllostomid bat species. *Z Säugetierkd* 55: 49–54.
64. Giannini NP, Kalko EKV (2004) Trophic structure in a large assemblage of phyllostomid bats in Panama. *Oikos* 105: 209–220.
65. Kalko EKV, Herre EA, Handley CO Jr. (1996) Relation of fig fruit characteristics to fruit-eating bats in the New and Old World tropics. *J Biogeogr* 23: 565–576.
66. Wendeln MC, Runkle JR, Kalko EKV (2000) Nutritional values of 14 fig species and bat feeding preferences in Panama. *Biotropica* 32: 489–501.
67. Hardy OJ, Maggia L, Bandou E, Breyne P, Caron H, Chevallier M-H, et al. (2006) Fine-scale genetic structure and gene dispersal inferences in 10 neotropical tree species. *Mol Ecol* 15: 559–571. PMID: [16448421](#)

68. Jump AS, Rico L, Coll M, Penuelas J (2012) Wide variation in spatial genetic structure between natural populations of the European beech (*Fagus sylvatica*) and its implications for SGS comparability. *Heredity* 108: 633–639. doi: [10.1038/hdy.2012.1](https://doi.org/10.1038/hdy.2012.1) PMID: [22354112](https://pubmed.ncbi.nlm.nih.gov/22354112/)
69. Guillot G, Leblois R, Coulon A, Frantz AC (2009) Statistical methods in spatial genetics. *Mol Ecol* 18: 4734–4756. doi: [10.1111/j.1365-294X.2009.04410.x](https://doi.org/10.1111/j.1365-294X.2009.04410.x) PMID: [19878454](https://pubmed.ncbi.nlm.nih.gov/19878454/)
70. Renoult JP, Kjellberg F, Grout C, Santoni S, Khadari Bb (2009) Cyto-nuclear discordance in the phylogeny of *Ficus* section *Galoglychia* and host shifts in plant-pollinator associations. *BMC Evol Biol* 9: 248. doi: [10.1186/1471-2148-9-248](https://doi.org/10.1186/1471-2148-9-248) PMID: [19822002](https://pubmed.ncbi.nlm.nih.gov/19822002/)
71. Saeki I, Dick CW, Barnes BV, Murakami N (2011) Comparative phylogeography of red maple (*Acer rubrum* L.) and silver maple (*Acer saccharinum* L.): impacts of habitat specialization, hybridization and glacial history. *J Biogeogr* 38: 992–1005.
72. Scotti-Saintagne C, Dick CW, Caron H, Vendramin GG, Troispoux V, Sire P, et al. (2013) Amazon diversification and cross-Andean dispersal of the widespread Neotropical tree species *Jacaranda copaia* (Bignoniaceae). *J Biogeogr* 40: 707–719.
73. Rymer PD, Dick CW, Vendramin GG, Buonamici A, Boshier D (2013) Recent phylogeographic structure in a widespread ‘weedy’ Neotropical tree species, *Cordia alliodora* (Boraginaceae). *J Biogeogr* 40: 693–706.
74. Cavers S, Dick CW (2013) Phylogeography of Neotropical trees. *J Biogeogr* 40: 615–617.
75. Dick CW, Heuertz M (2008) The complex biogeographic history of a widespread tropical tree species. *Evolution* 62: 2760–2774. doi: [10.1111/j.1558-5646.2008.00506.x](https://doi.org/10.1111/j.1558-5646.2008.00506.x) PMID: [18764917](https://pubmed.ncbi.nlm.nih.gov/18764917/)
76. Dick CW, Lewis SL, Maslin M, Bermingham E (2013) Neogene origins and implied warmth tolerance of Amazon tree species. *Ecology and Evolution* 3: 162–169.
77. Wang R, Ai B, Gao BQ, Yu S, Li YY, Chen XY (2009) Spatial genetic structure and restricted gene flow in a functionally dioecious fig, *Ficus pumila* L. var. *pumila* (Moraceae). *Popul Ecol* 51: 307–315.
78. Molbo D, Machado CA, Sevenster JG, Keller L, Herre EA (2003) Cryptic species of fig-pollinating wasps: Implications for the evolution of the fig-wasp mutualism, sex allocation, and precision of adaptation. *Proc Natl Acad Sci USA* 100: 5867–5872. PMID: [12714682](https://pubmed.ncbi.nlm.nih.gov/12714682/)
